## DEVELOPMENTAL BIOLOGY & STEM CELLS

# Analysis of single nucleotide variants in CRISPR-Cas9 edited zebrafish embryos shows no evidence of off-target inflation

Marie R Mooney<sup>1</sup>, Erica E Davis<sup>1</sup>, and Nicholas Katsanis<sup>1\*</sup>

### Affiliations

<sup>1</sup>Center for Human Disease Modeling and Department of Cell Biology, Duke University, Durham, NC 27710, USA

**\*Corresponding author:** Nicholas Katsanis, [nicholas.katsanis@duke.edu](mailto:nicholas.katsanis@duke.edu)

**Keywords:** CRISPR-Cas9, zebrafish, exome, de novo mutation

### Running title

No CRISPR-Cas9 off-target variants in zebrafish

1 **Abstract**

2 Therapeutic applications of CRISPR-Cas9 gene editing have spurred innovation in Cas9  
3 enzyme engineering and single guide RNA (sgRNA) design algorithms to minimize potential off-  
4 target events. While recent work in rodents outlines favorable conditions for specific editing and  
5 uses a trio design to control for the contribution of natural genome variation, the potential for  
6 CRISPR-Cas9 to induce *de novo* mutations *in vivo* remains a topic of interest. In zebrafish, we  
7 performed whole exome sequencing (WES) on two generations of offspring derived from the  
8 same founding pair: 54 exomes from control and CRISPR-Cas9 edited embryos in the first  
9 generation (F0), and 16 exomes from the progeny of inbred F0 pairs in the second generation  
10 (F1). We did not observe an increase in the number of transmissible variants in edited  
11 individuals in F1, nor in F0 edited mosaic individuals, arguing that *in vivo* editing does not  
12 precipitate an inflation of deleterious point mutations.

## 13 **Introduction**

14 CRISPR-Cas9 gene editing technology has offered powerful investigative tools and opened new  
15 potential avenues for the treatment of genetic disorders. Nonetheless, like preceding  
16 technologies, the clinical implementation of CRISPR-Cas9 editing faces potential barriers.  
17 These include restricted control over the delivery and activity of the system; immune responses  
18 to the system components; and permanent alteration of unintended genomic targets (Ho et al.,  
19 2018). In cell culture systems, the alteration of off-target regions decreases precipitously with  
20 the use of stringently designed sgRNA sequences and Cas9 enzymes engineered for high  
21 specificity (Doench et al., 2016; Fu et al., 2013; Hu et al., 2018), though recent work  
22 demonstrates that precise control over the nature of editing even at on-target sites remains  
23 challenging (Kosicki et al., 2018). In rodents, these same factors influence the efficiency and  
24 specificity of CRISPR-Cas9 editing (Anderson et al., 2018). However, examination of atypical  
25 CRISPR-Cas9 influence on organisms remains limited; it is often focused primarily on predicted  
26 off-target assessment and is not always agnostic (Varshney et al., 2015).

27         Here, we evaluated the incidence and transmission of off-target effects in a cohort of  
28 CRISPR-Cas9 edited zebrafish embryos derived from the same founding pair. Using 52  
29 zebrafish embryos from the same clutch targeted with sgRNAs with variable on-target efficiency,  
30 we whole-exome sequenced DNA from the entire cohort and their genetic parents and we  
31 measured the transmission of variants to the next generation.

32

33

## 34 **Results**

### 35 **Generating and sequencing CRISPR-Cas9-edited F0 and F1 individuals**

36 We focused on three different genes (*anln*, *kmt2d*, and *smchd1*) for which (a) we have  
37 substantial experience in this model organism and (b) which give reproducible, quantitative  
38 defects in kidney morphogenesis (Hall et al., 2018), mandibular and neuronal development  
39 (Tsai et al., 2018), and craniofacial morphogenesis (Shaw et al., 2017). For each locus, we used  
40 sgRNAs that had the following three characteristics. First, for each of the three genes, we  
41 selected an sgRNA with demonstrated high efficiency (100%) and an sgRNA with low efficiency  
42 (~30%), as determined by heteroduplex analysis and Sanger sequencing of cloned PCR  
43 products (Hall et al., 2018; Shaw et al., 2017; Tsai et al., 2018) (Suppl. Figure 1). Second, we  
44 mandated that all sgRNAs have a high specificity score (MIT specificity score 79-99 for each  
45 sgRNA; Suppl. Table S1). Finally, we required that each sgRNA was predicted to generate off-  
46 target effects with low cutting frequency determination (CFD) scores (mean = 0.17, range = 0-  
47 0.73; Suppl. Figure 2).

48 Next, we co-injected each sgRNA and Cas9 protein into wild-type zebrafish embryos  
49 from the same clutch at the 1-cell stage. For each sgRNA, we harvested DNA from six edited  
50 individuals to serve as technical replicates. In addition, we collected DNA from two individuals  
51 for each of the following conditions: uninjected, sgRNA alone, or Cas9 alone (Figure 1A).  
52 Finally, to assess the potential transmission of *de novo* variants to the next generation, we  
53 raised the F0 cohort for the *smchd1* high efficiency sgRNA and intercrossed adults to obtain the  
54 F1 generation. In total, we performed whole exome sequencing (WES) on two parents, 52 F0  
55 individuals and 16 F1 individuals (Figure 1A). WES resulted in 76x average target coverage in  
56 F0 samples and 115x average target coverage in F1 individuals (Figure 1B, C). The F0  
57 sequencing data covered 83% of the exome at  $\geq 30x$  and 65% at  $\geq 50x$ . The F1 sequencing data  
58 covered 88% of the exome at  $\geq 30x$  and 78% of the exome at  $\geq 50x$ .

## 59 ***De novo* mutation counts are not inflated in F1 exomes**

60 Low-level mosaicism remains challenging to detect in WES data and it is prone to high false-  
61 positive and false-negative rates (Sandmann et al., 2017). For this reason, we first focused on  
62 transmitted events. If CRISPR-Cas9 editing does induce off-target *de novo* mutations, we  
63 should observe an increase above baseline in the number of heterozygous variants fixed in the  
64 CRISPR-edited F1 generation that were absent from the grandparents.

65         Given the estimated 0.01% gene level baseline mutation rate in zebrafish (Mullins et al.,  
66 1994), we expect approximately 2-3 exonic changes per generation. To measure the observed  
67 rates, we applied a trio sequencing workflow aligned with GATK best practices and we called  
68 both single nucleotide variants and indels with two established variant callers: VarScan2 or  
69 Mutect2 (Figure 1D). Starting with all calls, we performed multiple data filtering steps. First, we  
70 removed variants present in either of the grandparental exomes. Second, since a small number  
71 of variants might have appeared *de novo* because of missing data from either grandparent, we  
72 also excluded alleles reported in the zebrafish ensembl dbSNP database. Third, we removed  
73 variants from the on-target genome locations (Suppl. Figure 3). Together, these three filters  
74 removed 79% of the MuTect2 and 99% of the VarScan2 calls. As an additional data filtering  
75 step, we removed repetitive elements, regions of potential segmental duplication in zebrafish,  
76 and indel variants containing homo-, dinucleotide, and trinucleotide repeats. This step improved  
77 the transition-transversion ratio from 0.91 to 1.09 which approaches a previously reported ratio  
78 of 1.2 for zebrafish (Stickney et al., 2002) (Suppl. Figure 4). Finally, we removed cross-noise  
79 variants found in two or more samples that likely represent systematic technical error or  
80 uncalled low-level mosaics from the grandparents.

81         Using this dataset (Suppl. Table S2), we then applied a filter for allele frequency (AF)  
82 above 0.3 to capture the fixed heterozygous variants and we compared the variant count  
83 differences between F1 embryos derived from edited and unedited F0 adults. VarScan2 reports  
84 candidate variant counts closer to the expected natural accumulation of *de novo* mutations in F1

85 than MuTect2 (average 20 vs 66, respectively; Suppl. Table S3). We calculated the critical p-  
86 value threshold Bonferroni correction for three groups ( $p < 0.012$ ), and neither calling method  
87 reports a significant difference between progeny of edited and control adults ( $p > 0.11$ ; Wilcox  
88 rank test, Suppl. Table S4).

89         Next, we focused on the VarScan2 results. Based on the >5-fold inflation of observed  
90 versus expected variant calls across the cohort (mean of 20 vs 2-3, respectively; Figure 2A) we  
91 hypothesized that these agnostically filtered calls still included false positives. Therefore, we  
92 reviewed the variant calls in the Integrative Genomics Viewer (IGV). We found two sources of  
93 false positives. First, a subset of read alignments filled into small deletions observed in the  
94 grandparents rather than extend a gap (83% of calls). Second, local realignments involving  
95 small deletions misalign in the progeny, even though an alternative placement of the deletion  
96 results in a grandparental genotype (10% of calls).  
97 Of the remaining calls, half were deemed unlikely to be *bona fide* variants for other reasons.  
98 These included complex regions with many error prone reads; abundance of mis-mapped read  
99 pairs; and remaining low level mosaicism in grandparents. The other half were unambiguous *de*  
100 *novo* heterozygous variants (Figure 2B). Notably, most of the unambiguous variants were also  
101 called by MuTect2 (10 of 11; Figure 2C). For this population of alleles, we observed no  
102 difference between control and edited groups called by both callers (Suppl. Table S5). Crucially,  
103 we confirmed all of the variants detected by both callers in F1 animals derived from  
104 CRISPR/Cas edited individuals by Sanger sequencing. Taken together, we found that,  
105 regardless of whether we consider agnostic or manually reviewed variant numbers, there is no  
106 predilection toward inflated variant counts in F1 offspring derived from edited versus control  
107 groups. Further, the observed number of *de novo* variants in F1s does not exceed the expected  
108 rate of 2-3 per exome, per generation.

109 ***De novo* mutation counts are not inflated across the multigenerational cohort**

110 We then returned to the F0 cohort to investigate whether variant burden outside of the targeted  
111 locus differed among individuals injected with sgRNA in the presence or absence of Cas9.  
112 Importantly, the expected allelic series of variants are reported robustly at the on-target  
113 locations of the sgRNAs against two of the target genes, *anln* on chromosome 19 and *kmt2d* on  
114 chromosome 23 (Supplementary Figure 3A) (Hall et al., 2018; Tsai et al., 2018). No on-target  
115 variants are observed for the *smchd1* locus because our exome capture did not include baits for  
116 this locus in the Zv9 assembly of the zebrafish genome. However, we demonstrated  
117 experimentally the on-target CRISPR-editing capability of the two *smchd1* sgRNAs and the  
118 transmission of on-target variants produced by the high-efficiency sgRNA to the F1 generation  
119 via Sanger sequencing (Supplementary Figure 3B), as described (Shaw et al., 2017).

120 We first considered the agnostic off-target VarScan2 variants called in the mosaic F0  
121 generation (Suppl. Table S6). Initially, we applied the same arbitrary 0.3 AF threshold that we  
122 used with the F1 calls, reasoning that editing occurs at the one-to-two cell stage and would  
123 likely manifest as an off-target inflation at high allele frequencies. We determined the Bonferroni  
124 correction threshold for four groups ( $p < 0.012$ ), and again, we did not observe a significant  
125 inflation in *de novo* variant counts between control and F0 edited groups, in either the  
126 algorithmically predicted counts or the manually reviewed counts ( $p > 0.15$ ; Wilcoxon rank test;  
127 Figure 2A, B; Table S7). We then repeated the analysis on the agnostic MuTect2 call set, and  
128 consistent with the filtered VarScan2 data, we did not observe an inflation in *de novo* mutation  
129 counts between control and edited groups ( $p > 0.04$ ; Suppl. Table S7). Finally, because a 0.3 AF  
130 may fail to detect inefficient targeting events or lower mosaicism levels, we tested lower cutoff  
131 frequencies. At either an arbitrary 0.1 AF threshold, or without applying a threshold, we still  
132 observe no significant differences ( $p > 0.08$ ; Suppl. Table S7).

133 For the VarScan2 dataset generated from F0 exomes, the variant count exceeded the  
134 expected 2-3 *de novo* changes per exome in at least one individual in half of the edited

135 conditions (Figure 2A). To exclude the possibility that these could be false positive calls, similar  
136 to what we observed in the F1 cohort, we inspected all variants exceeding the 0.3 AF cutoff  
137 using IGV. We found that this dataset also was subject to similar technical artifacts as observed  
138 for F1s; exclusion of these variants brought the *de novo* mutation call number within the  
139 expected range (Figure 2B). Using the same Bonferroni correction for four groups ( $p < 0.012$ ), we  
140 were unable to detect a difference between control versus edited groups ( $p > 0.38$ ; Suppl. Table  
141 S8). Since we had observed that variants detected by both callers represented an unbiased way  
142 to assess high confidence calls in F1, we also asked whether we could detect a difference in  
143 variant counts in this subset of calls in F0 (7 of 8 unambiguous calls; Figure 2C). Again, we  
144 observed no significant differences between controls and edited groups ( $p > 0.78$ ; Suppl. Table  
145 S9).

146

#### 147 ***De novo* mutations are not observed at predicted off-target sites**

148 To examine the potential incidence of off-target mutations more sensitively, we removed the  
149 filters on the variant calls and searched predicted off target sites across our multigenerational  
150 cohort using three algorithms: the MIT CRISPR design site, the CRISPR-direct engine, and  
151 CAS-OFFinder, for any variants occurring within 100 bp flanking a predicted off-target site.  
152 Consistent with previous reports (Hruscha et al., 2013; Varshney et al., 2015), we found no  
153 support for single nucleotide variants or small indels occurring at predicted off-target locations in  
154 the F1 generation, and sporadic low allele frequency calls near predicted off-target regions in  
155 F0s. The number of reported variants in the F0 samples are not significantly different than  
156 expected by chance ( $p > 0.08$ ; Supplementary Table S10).

157 We reviewed the 15 reported variant calls near predicted off-target sites in F0s, and  
158 found that none are supported by both variant callers (Supplementary Table S11). Seven are  
159 also reported in siblings subjected to editing with alternative guides or control conditions,  
160 making them unlikely to be induced by Cas9-mediated genome editing. Another four were not



161 supported by reads on both strands. Of the four remaining variants, one was only reported in a  
162 control condition, making it unlikely to be a result of editing. The other three occur at a 5%  
163 alternate allele frequency, near the limit of detection for the variant callers, increasing the  
164 likelihood that they may be artifacts. We do note that one variant has features consistent with an  
165 expected off-target cut. This is a small deletion reported directly at a predicted off-target cut site  
166 detected by two prediction engines (Supplementary Table S10). Notably, this small deletion  
167 occurs in an exonic region, has a high CFD risk score (CFD score = 0.52), and is observed at  
168 the predicted locus in a few reads from the VarScan2 call set as well, even though it is not  
169 called by that algorithm. Together, our analysis of reported variants near predicted off-target  
170 sites detects one potential off-target variant at low allele frequency in a single individual and  
171 does not demonstrate an inflated or transmissible mutation burden conjoint with expected on-  
172 target deletions.

173

## 174 **Discussion**

175 Trio sequencing designs enable off-target analyses to distinguish gene editing effects from  
176 natural and inherited genetic variation. In our study, the bulk of variant calls in zebrafish exomes  
177 are filtered out due to their existence in the parental strain. Our ability to recover transmissible  
178 on-target deletions and Sanger-validated *de novo* mutations outside of predicted off-target  
179 regions and in quantities indistinguishable from natural variation suggests that off-target  
180 CRISPR events occur infrequently.

181 Our results are consistent with previous results in zebrafish demonstrating limited off-  
182 target activity at select predicted regions (Hruscha et al., 2013; Varshney et al., 2015) and with  
183 recent work in mice that found limited support for off-target effects genome-wide (Iyer et al.,  
184 2018). However, we are limited to detecting potential off-target variation within the exon-capture  
185 space of the genome. We did not assess large structural variants or long deletions at the on-  
186 target site. In addition, we occasionally observed trends toward variant inflation in the predicted

187 variant call sets that were related to sequencing depth and did not survive visual inspection.  
188 This observation suggests that even with trio designs and other precautionary measures, care  
189 should be exercised in interpreting variant predictions agnostically and that sequencing even  
190 more individuals per condition may be required to expose subtle differences in off-target effects.

191 In response to initial reports that CRISPR-Cas9 edited mammalian cells harbored off-  
192 target variants (Fu et al., 2013; Zhang et al., 2015), many iterative improvements in technology  
193 and experimental design have outlined conditions for achieving CRISPR-Cas9 gene editing  
194 while limiting off-target events. Our experimental and sgRNA design incorporated such  
195 advancements (high on-target MIT ranking, low off-target CFD scores, high cutting efficiency,  
196 and short Cas9 exposure), minimizing the chance of inducing off-target events. However,  
197 unexpected nuances of the CRISPR-Cas9 editing system continue to emerge. Varied biological  
198 responses to CRISPR-Cas9, such as DNA damage repair (Haapaniemi et al., 2018), enzymatic  
199 immunity (Crudele and Chamberlain, 2018), and alternative templating (Ma et al., 2017)  
200 exemplify our still nascent understanding of DNA and RNA editing. Furthermore, natural human  
201 genetic variation has been shown to influence both the efficaciousness of on-target editing and  
202 the frequency of off-target editing (Lessard et al., 2017). Under these circumstances, use of  
203 emergent computational, laboratory, and animal modeling tools and unbiased genome-wide off-  
204 target assessments will facilitate the foundational knowledge required to reduce unnecessary  
205 risk in practice.

206

## 207 **Methods**

### 208 *CRISPR-Cas9 gene editing in zebrafish embryos*

209 We used CHOPCHOP (Labun et al., 2016) to identify sgRNAs targeting a sequence within the  
210 coding regions of the target genes and sgRNAs were *in vitro* transcribed using the GeneArt  
211 precision gRNA synthesis kit (Thermo Fisher, Waltham, MA) according to the manufacturer's  
212 instructions. See Supplemental Figure S1, Table S1, and references (Hall et al., 2018; Shaw et

213 al., 2017; Tsai et al., 2018) for details on targeting sequences/locations and sgRNA efficiency.  
214 Zebrafish embryos from a single clutch from a natural mating of a ZDR background founder pair  
215 were either uninjected or injected into the cell at the 1-cell stage with a 1 nl cocktail of 100 pg/nl  
216 sgRNA, 200 pg/nl Cas9 protein (PNA Bio, Newbury Park, CA), or a combination of both  
217 reagents. We extracted genomic DNA (gDNA) from tail clips of parental zebrafish or whole  
218 zebrafish embryos at 4 dpf.

219

### 220 *Sample Selection for Sequencing*

221 The ZDR strain in our laboratory gives consistently robust clutch sizes of ~100 embryos. To  
222 preserve enough individuals to generate an F1 generation, we anticipated that we would have  
223 approximately 50 individuals available for exome sequencing. Using the CFD score cut-off of  
224 0.2 as a threshold for the likelihood of inducing transmissible off-target mutations, we expected  
225 that we would need at least 5-6 embryos per condition to observe one of these events. Thus, we  
226 selected six independent embryos per gRNA plus Cas9 condition for comparison with controls  
227 while maintaining the experiment within a single clutch to control for inherited variation.

228

### 229 *Heteroduplex Editing Efficiency by PAGE*

230 For each sgRNA plus Cas9 condition we PCR-amplified gDNA from 12 embryos per batch using  
231 site-specific primers and screened for heteroduplex formation as described (Zhu et al., 2014).  
232 Five samples with evidence of heteroduplex formation were gel purified alongside a control  
233 sample, 'A' overhangs were added to the PCR products, and the products were cloned into a  
234 TOPO4 vector (Thermo Fisher). We picked 12 colonies per embryo to estimate targeting  
235 efficiency by Sanger sequencing.

236

### 237 *Whole Exome Sequencing*

238 We used the manufacturer protocol for the Agilent SureSelect Capture kit for non-human  
239 exomes with 200 ng gDNA per individual (75 Mb capture designed on the zv9 version of the  
240 zebrafish genome; Agilent SSXT Zebrafish All Exon kit; Agilent Technologies, Santa Clara, CA).  
241 Samples were multiplexed and run across two lanes of the Illumina HiSeq 4000 as paired-end  
242 150 bp reads. Sequence data were demultiplexed and Fastq files were generated using  
243 Bcl2Fastq conversion software (Illumina, San Diego, CA).

244

#### 245 *Variant Calling*

246 Sequencing reads were processed using the TrimGalore toolkit (Krueger, 2017) which employs  
247 Cutadapt to trim low quality bases and Illumina sequencing adapters from the 3' end of the  
248 reads. Only reads that were 20 nt or longer after trimming were kept for further analysis. Using  
249 the BWA (v. 0.7.15) MEM algorithm (Li, 2013), reads were mapped to the Zv9 version of the  
250 zebrafish genome. Picard tools (*Picard*, 2017) (v. 2.14.1) were used to remove PCR duplicates  
251 and to calculate sequencing metrics. The Genome Analysis Toolkit (McKenna et al., 2010)  
252 (GATK, v. 3.8-0) MuTect2 caller was used to call variants between each experimental condition  
253 and the adult male and adult female samples separately. Independently, aligned reads were  
254 locally realigned with the GATK IndelRealigner and then processed with Samtools mpileup (Li,  
255 2011) for variant calling with VarScan2 trio (Koboldt et al., 2013). VarScan2 variant call sets  
256 were generated with the minimum coverage specified at 30x.

257

#### 258 *Variant analysis*

259 We used BEDOPS (Neph et al., 2012) and Bedtools (Quinlan and Hall, 2010) intersect, window,  
260 and merge commands to exclude variants with support in either parent, variants reported to  
261 occur in wild-type zebrafish strains ensembl dbSNP version 79, variants in repeat regions or  
262 regions of predicted segmental duplication in the genome (Khaja et al., 2006), variants reported

263 in both control individuals and CRISPR-edited individuals, and variants reported at the on-target  
264 locations for CRISPR-editing. The potential for variants to occur due to off-target CRISPR-  
265 mediated editing was assessed by comparing variant counts between groups with either a  
266 Wilcoxon rank test for two groups, or a Kruskal-Wallis rank test for more than two groups and  
267 assessing the p-value against a Bonferroni critical value to correct for multiple testing. In  
268 addition, variants from samples were compared with locations of predicted off-target regions  
269 (formatted into a .bed file) from three algorithms: CRISPOR (Concordet and Haeussler, 2018),  
270 the CRISPRdirect engine with 12-mer to 20-mer hits, or Cas9-OFFinder allowing 3-mismatches  
271 and 1-bulge in either DNA or RNA. Hypergeometric p-values calculated with the Rothstein lab  
272 hypergeometric calculator, use the capture space (74691693 bp) as the population size, and a  
273 reasonable high vs low sequencing error rate for our Illumina platform (.24% vs .1%) (Pfeiffer et  
274 al., 2018) to calculate the expected number of population variants called by chance at a position  
275 covered at the F0 average read depth (4 or more errant reads at the position;  $AF > .05$ ).

276

## 277 **Acknowledgements**

278 We are grateful to I-Chun Tsai, Maria Kousi, Zachary Kupchinsky and Igor Pediaditakis for  
279 technical assistance. This work was supported by a fellowship from U.S. National Institutes of  
280 Health Grant 5T32HG008955-02 (M.M.). We thank Nicolas Devos (Duke Sequencing and  
281 Genomic Technologies Shared Resource) and David Corcoran (Duke Genomic Analysis and  
282 Bioinformatics Shared Resource) for sequencing and informatics support, respectively. Some  
283 analyses were carried out using resources from the Duke Compute Cluster. N.K. is a  
284 Distinguished Jean and George Brumley Professor.

285

## 286 **Conflict of interest**

287 N.K. is a paid consultant for and holds significant stock of Rescindo Therapeutics, Inc. The other  
288 authors have no conflicts of interest to declare.

289 **References**

- 290 Anderson KR, Haeussler M, Watanabe C, Janakiraman V, Lund J, Modrusan Z, Stinson J, Bei Q,  
291 Buechler A, Yu C, Thamminana SR, Tam L, Sowick M-A, Alcantar T, O’Neil N, Li J, Ta  
292 L, Lima L, Roose-Girma M, Rairdan X, Durinck S, Warming S. 2018. CRISPR off-target  
293 analysis in genetically engineered rats and mice. *Nat Methods* **15**:512–514.  
294 doi:10.1038/s41592-018-0011-5
- 295 Concordet J-P, Haeussler M. 2018. CRISPOR: intuitive guide selection for CRISPR/Cas9  
296 genome editing experiments and screens. *Nucleic Acids Res* **46**:W242–W245.  
297 doi:10.1093/nar/gky354
- 298 Crudele JM, Chamberlain JS. 2018. Cas9 immunity creates challenges for CRISPR gene editing  
299 therapies. *Nat Commun* **9**:3497. doi:10.1038/s41467-018-05843-9
- 300 Doench JG, Fusi N, Sullender M, Hegde M, Vaimberg EW, Donovan KF, Smith I, Tothova Z,  
301 Wilen C, Orchard R, Virgin HW, Listgarten J, Root DE. 2016. Optimized sgRNA design  
302 to maximize activity and minimize off-target effects of CRISPR-Cas9. *Nat Biotechnol*  
303 **34**:184–191. doi:10.1038/nbt.3437
- 304 Fu Y, Foden JA, Khayter C, Maeder ML, Reyon D, Joung JK, Sander JD. 2013. High-frequency  
305 off-target mutagenesis induced by CRISPR-Cas nucleases in human cells. *Nat Biotechnol*  
306 **31**:822–826. doi:10.1038/nbt.2623
- 307 Haapaniemi E, Botla S, Persson J, Schmierer B, Taipale J. 2018. CRISPR–Cas9 genome editing  
308 induces a p53-mediated DNA damage response. *Nat Med* **24**:927–930.  
309 doi:10.1038/s41591-018-0049-z
- 310 Hall G, Lane BM, Khan K, Pediaditakis I, Xiao J, Wu G, Wang L, Kovalik ME, Chryst-Stangl  
311 M, Davis EE, Spurney RF, Gbadegesin RA. 2018. The Human FSGS-Causing ANLN

- 312 R431C Mutation Induces Dysregulated PI3K/AKT/mTOR/Rac1 Signaling in Podocytes.  
313 *J Am Soc Nephrol* **29**:2110–2122. doi:10.1681/ASN.2017121338
- 314 Ho BX, Loh SJH, Chan WK, Soh BS. 2018. In Vivo Genome Editing as a Therapeutic  
315 Approach. *Int J Mol Sci* **19**:2721. doi:10.3390/ijms19092721
- 316 Hruscha A, Krawitz P, Rechenberg A, Heinrich V, Hecht J, Haass C, Schmid B. 2013. Efficient  
317 CRISPR/Cas9 genome editing with low off-target effects in zebrafish. *Dev Camb Engl*  
318 **140**:4982–4987. doi:10.1242/dev.099085
- 319 Hu JH, Miller SM, Geurts MH, Tang W, Chen L, Sun N, Zeina CM, Gao X, Rees HA, Lin Z,  
320 Liu DR. 2018. Evolved Cas9 variants with broad PAM compatibility and high DNA  
321 specificity. *Nature* **556**:57–63. doi:10.1038/nature26155
- 322 Iyer V, Boroviak K, Thomas M, Doe B, Riva L, Ryder E, Adams DJ. 2018. No unexpected  
323 CRISPR-Cas9 off-target activity revealed by trio sequencing of gene-edited mice. *PLOS*  
324 *Genet* **14**:e1007503. doi:10.1371/journal.pgen.1007503
- 325 Khaja R, MacDonald JR, Zhang J, Scherer SW. 2006. Methods for identifying and mapping  
326 recent segmental and gene duplications in eukaryotic genomes. *Methods Mol Biol Clifton*  
327 *NJ* **338**:9–20. doi:10.1385/1-59745-097-9:9
- 328 Koboldt DC, Larson DE, Wilson RK. 2013. Using VarScan 2 for Germline Variant Calling and  
329 Somatic Mutation Detection. *Curr Protoc Bioinforma Ed Board Andreas Baxevanis Al*  
330 **44**:15.4.1-15.4.17. doi:10.1002/0471250953.bi1504s44
- 331 Kosicki M, Tomberg K, Bradley A. 2018. Repair of double-strand breaks induced by CRISPR–  
332 Cas9 leads to large deletions and complex rearrangements. *Nat Biotechnol* **36**:765–771.  
333 doi:10.1038/nbt.4192
- 334 Krueger F. 2017. Trim Galore! Babraham Bioinformatics.

- 335 Labun K, Montague TG, Gagnon JA, Thyme SB, Valen E. 2016. CHOPCHOP v2: a web tool for  
336 the next generation of CRISPR genome engineering. *Nucleic Acids Res* **44**:W272–W276.  
337 doi:10.1093/nar/gkw398
- 338 Lessard S, Francioli L, Alföldi J, Tardif J-C, Ellinor PT, MacArthur DG, Lettre G, Orkin SH,  
339 Canver MC. 2017. Human genetic variation alters CRISPR-Cas9 on- and off-targeting  
340 specificity at therapeutically implicated loci. *Proc Natl Acad Sci* **114**:E11257–E11266.  
341 doi:10.1073/pnas.1714640114
- 342 Li H. 2013. Aligning sequence reads, clone sequences and assembly contigs with BWA-MEM.  
343 *ArXiv13033997 Q-Bio*.
- 344 Li H. 2011. A statistical framework for SNP calling, mutation discovery, association mapping  
345 and population genetical parameter estimation from sequencing data. *Bioinforma Oxf*  
346 *Engl* **27**:2987–2993. doi:10.1093/bioinformatics/btr509
- 347 Ma H, Marti-Gutierrez N, Park S-W, Wu J, Lee Y, Suzuki K, Koski A, Ji D, Hayama T, Ahmed  
348 R, Darby H, Van Dyken C, Li Y, Kang E, Park A-R, Kim D, Kim S-T, Gong J, Gu Y, Xu  
349 X, Battaglia D, Krieg SA, Lee DM, Wu DH, Wolf DP, Heitner SB, Belmonte JCI, Amato  
350 P, Kim J-S, Kaul S, Mitalipov S. 2017. Correction of a pathogenic gene mutation in  
351 human embryos. *Nature* **548**:413–419. doi:10.1038/nature23305
- 352 McKenna A, Hanna M, Banks E, Sivachenko A, Cibulskis K, Kernytsky A, Garimella K,  
353 Altshuler D, Gabriel S, Daly M, DePristo MA. 2010. The Genome Analysis Toolkit: A  
354 MapReduce framework for analyzing next-generation DNA sequencing data. *Genome*  
355 *Res* **20**:1297–1303. doi:10.1101/gr.107524.110



- 356 Mullins MC, Hammerschmidt M, Haffter P, Nüsslein-Volhard C. 1994. Large-scale mutagenesis  
357 in the zebrafish: in search of genes controlling development in a vertebrate. *Curr Biol*  
358 4:189–202. doi:10.1016/S0960-9822(00)00048-8
- 359 Neph S, Kuehn MS, Reynolds AP, Haugen E, Thurman RE, Johnson AK, Rynes E, Maurano  
360 MT, Vierstra J, Thomas S, Sandstrom R, Humbert R, Stamatoyannopoulos JA. 2012.  
361 BEDOPS: high-performance genomic feature operations. *Bioinformatics* 28:1919–1920.  
362 doi:10.1093/bioinformatics/bts277
- 363 Pfeiffer F, Gröber C, Blank M, Händler K, Beyer M, Schultze JL, Mayer G. 2018. Systematic  
364 evaluation of error rates and causes in short samples in next-generation sequencing. *Sci*  
365 *Rep* 8:10950. doi:10.1038/s41598-018-29325-6
- 366 Picard. 2017. Broad Institute.
- 367 Quinlan AR, Hall IM. 2010. BEDTools: a flexible suite of utilities for comparing genomic  
368 features. *Bioinformatics* 26:841–842. doi:10.1093/bioinformatics/btq033
- 369 Sandmann S, de Graaf AO, Karimi M, van der Reijden BA, Hellström-Lindberg E, Jansen JH,  
370 Dugas M. 2017. Evaluating Variant Calling Tools for Non-Matched Next-Generation  
371 Sequencing Data. *Sci Rep* 7:43169. doi:10.1038/srep43169
- 372 Shaw ND, Brand H, Kupchinsky ZA, Bengani H, Plummer L, Jones TI, Erdin S, Williamson  
373 KA, Rainger J, Stortchevoi A, Samocha K, Currall BB, Dunican DS, Collins RL, Willer  
374 JR, Lek A, Lek M, Nassan M, Pereira S, Kammin T, Lucente D, Silva A, Seabra CM,  
375 Chiang C, An Y, Ansari M, Rainger JK, Joss S, Smith JC, Lippincott MF, Singh SS,  
376 Patel N, Jing JW, Law JR, Ferraro N, Verloes A, Rauch A, Steindl K, Zweier M, Scheer  
377 I, Sato D, Okamoto N, Jacobsen C, Tryggestad J, Chernausek S, Schimmenti LA,  
378 Brasseur B, Cesaretti C, García-Ortiz JE, Buitrago TP, Silva OP, Hoffman JD,

379 Mühlbauer W, Ruprecht KW, Loeys BL, Shino M, Kaindl AM, Cho C-H, Morton CC,  
380 Meehan RR, Heyningen V van, Liao EC, Balasubramanian R, Hall JE, Seminara SB,  
381 Macarthur D, Moore SA, Yoshiura K, Gusella JF, Marsh JA, Jr JMG, Lin AE, Katsanis  
382 N, Jones PL, Jr WFC, Davis EE, FitzPatrick DR, Talkowski ME. 2017. *SMCHD1*  
383 mutations associated with a rare muscular dystrophy can also cause isolated arhinia and  
384 Bosma arhinia microphthalmia syndrome. *Nat Genet* **49**:238–248. doi:10.1038/ng.3743  
385 Stickney HL, Schmutz J, Woods IG, Holtzer CC, Dickson MC, Kelly PD, Myers RM, Talbot  
386 WS. 2002. Rapid Mapping of Zebrafish Mutations With SNPs and Oligonucleotide  
387 Microarrays. *Genome Res* **12**:1929–1934. doi:10.1101/gr.777302  
388 Tsai I-C, McKnight K, McKinstry SU, Maynard AT, Tan PL, Golzio C, White CT, Price DJ,  
389 Davis EE, Amrine-Madsen H, Katsanis N. 2018. Small molecule inhibition of  
390 RAS/MAPK signaling ameliorates developmental pathologies of Kabuki Syndrome. *Sci*  
391 *Rep* **8**:10779. doi:10.1038/s41598-018-28709-y  
392 Varshney GK, Pei W, LaFave MC, Idol J, Xu L, Gallardo V, Carrington B, Bishop K, Jones M,  
393 Li M, Harper U, Huang SC, Prakash A, Chen W, Sood R, Ledin J, Burgess SM. 2015.  
394 High-throughput gene targeting and phenotyping in zebrafish using CRISPR/Cas9.  
395 *Genome Res* **25**:1030–1042. doi:10.1101/gr.186379.114  
396 Zhang X-H, Tee LY, Wang X-G, Huang Q-S, Yang S-H. 2015. Off-target Effects in  
397 CRISPR/Cas9-mediated Genome Engineering. *Mol Ther - Nucleic Acids* **4**:e264.  
398 doi:10.1038/mtna.2015.37  
399 Zhu X, Xu Y, Yu S, Lu L, Ding M, Cheng J, Song G, Gao X, Yao L, Fan D, Meng S, Zhang X,  
400 Hu S, Tian Y. 2014. An Efficient Genotyping Method for Genome-modified Animals and

401 Human Cells Generated with CRISPR/Cas9 System. *Sci Rep* 4:6420.

402 doi:10.1038/srep06420

403

404

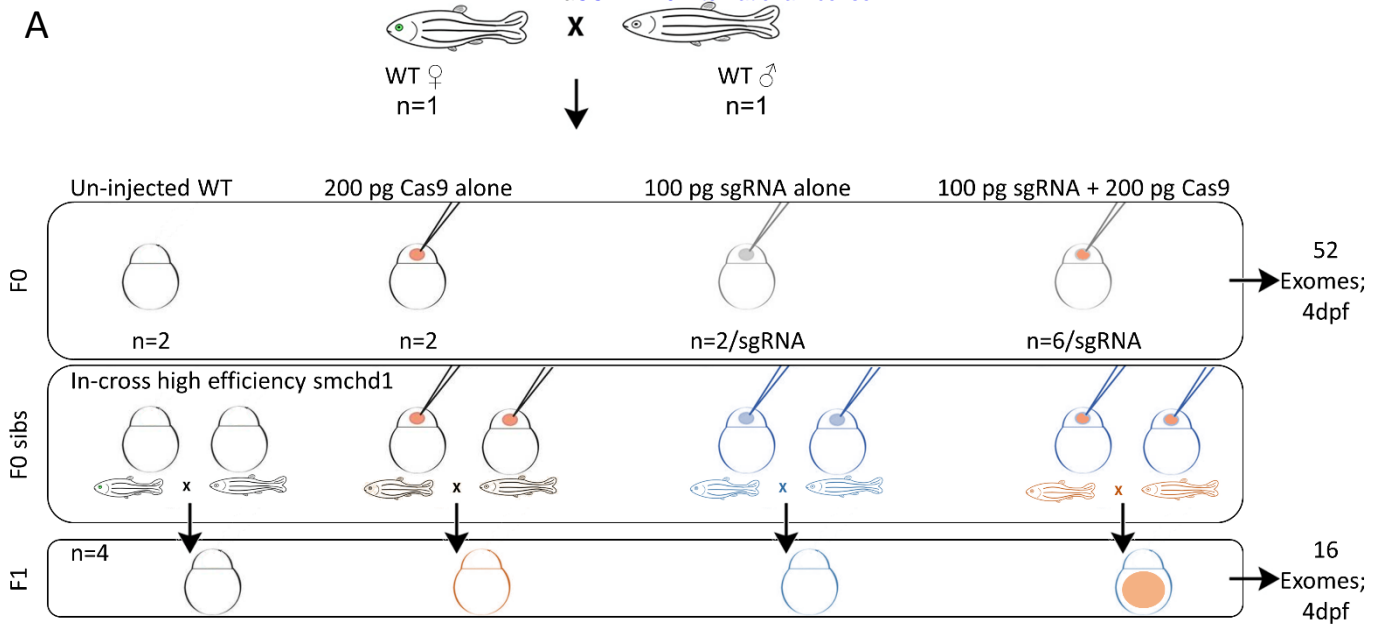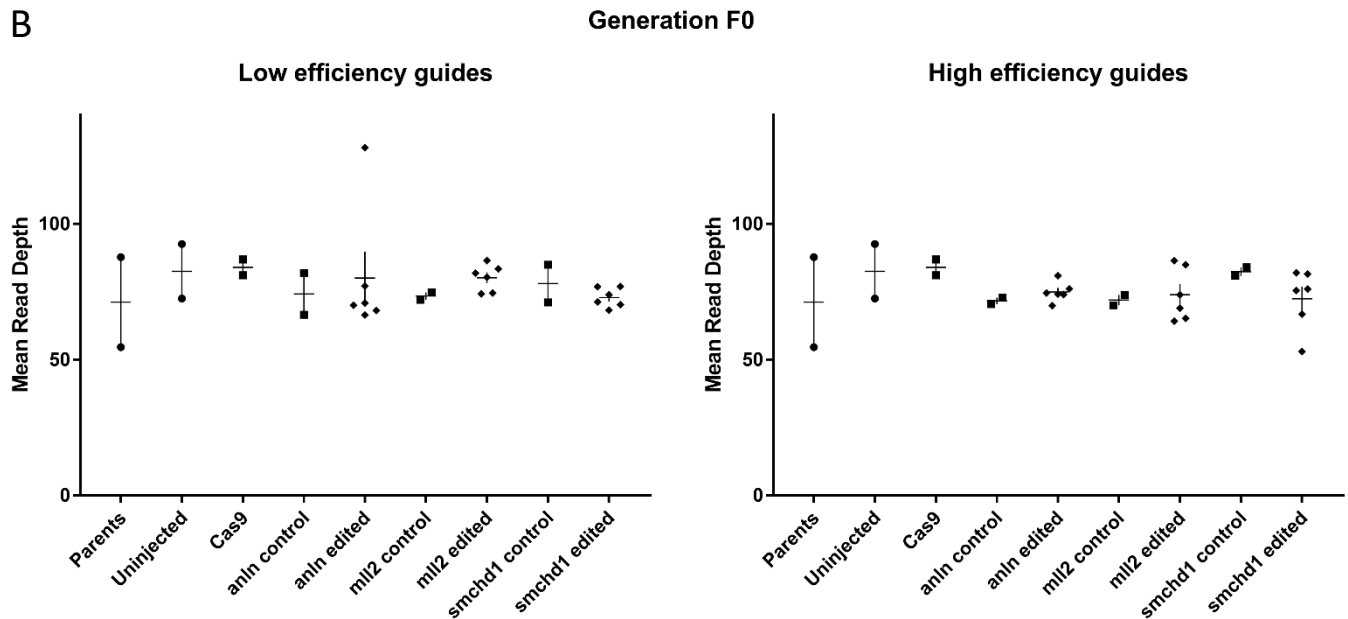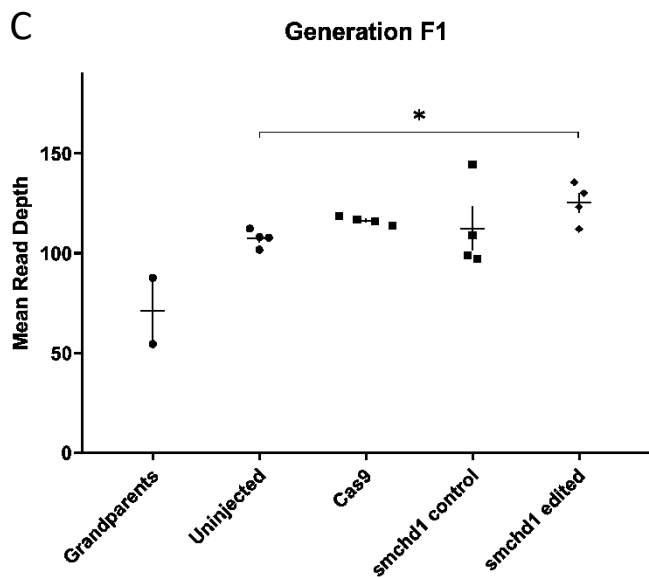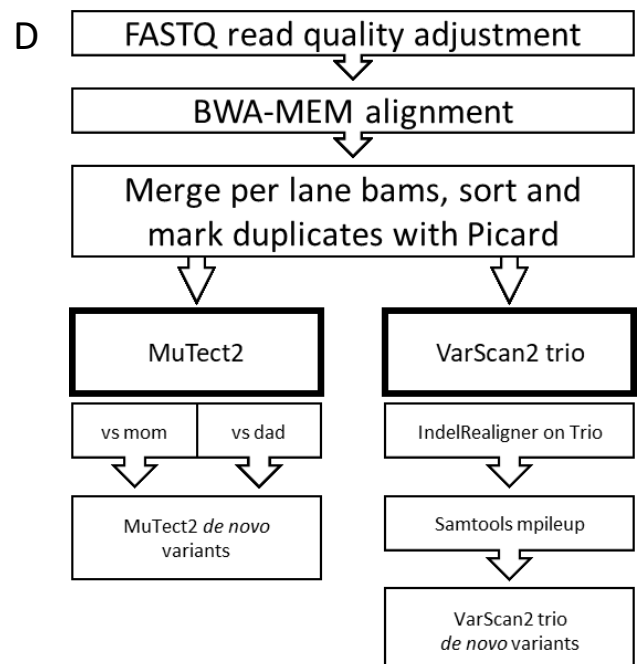

406 **Figure 1. Whole exome sequencing in two generations of CRISPR-Cas9 edited zebrafish.**

407 (A) The experimental design generates a single clutch of embryos from a founder pair of  
408 parents from the ZDR laboratory strain of wild-type zebrafish. A total of 52 embryos were  
409 selected for DNA extraction and sequencing at 4 dpf in the F0 generation (2 uninjected, 2 Cas9  
410 injected, 2 sgRNA injected across 6 different sgRNAs targeting 3 genes for a total of 12  
411 embryos, and 6 CRISPR-Cas9 embryos per sgRNA guide for a total of 36 edited individuals).  
412 Additional embryos for each condition were injected concurrently, but raised to adulthood. The  
413 *smchd1* high efficiency guide F0 in-cross generated F1 progeny for further sequencing (4  
414 uninjected, 4 Cas9 injected, 4 sgRNA injected, and 4 CRISPR-Cas9 injected embryos were  
415 selected for a total of 16 F1 exomes). (B) The first round of exome sequencing (F0 and parents)  
416 generated a consistent read depth averaging 76x coverage. (C) The second round of exome  
417 sequencing (F1) generated a consistently higher read depth averaging 115x coverage. The  
418 *smchd1* edited individuals are also sequenced to a higher depth than the uninjected controls  
419 ( $p < .05$ ). (D) After sequencing quality control and alignment, variant calling was performed with  
420 both somatic and germline callers to identify candidate *de novo* mutations.

421

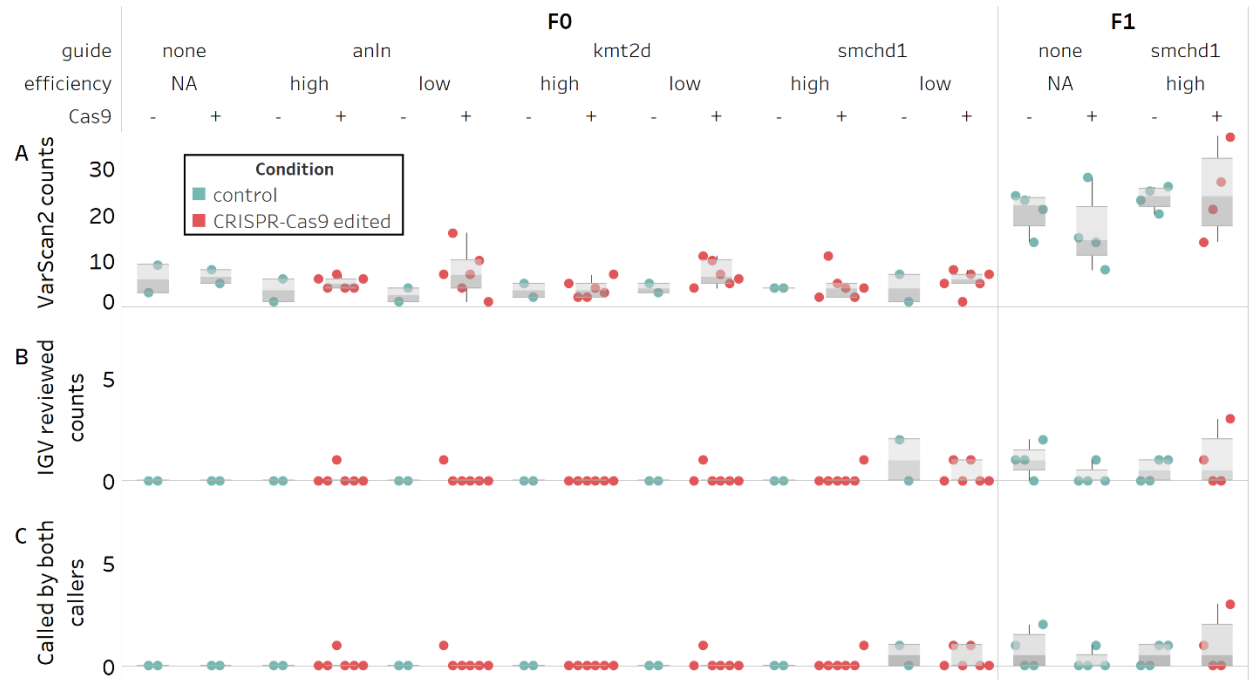

422

423 **Figure 2. Counts of candidate *de novo* mutations in control and edited individual**  
 424 **zebrafish embryos.** Variants persisting after filtering and with an allele frequency  $\geq 0.3$  are not  
 425 significantly different between control and CRISPR-Cas9 edited groups (N=68). (A) Predicted  
 426 counts by VarScan2. (B) Unambiguous heterozygous variants determined by visual inspection  
 427 of VarScan2 calls in IGV (C) Subset of predicted variants detected by both variants callers.

428

429

430

## Figure S1

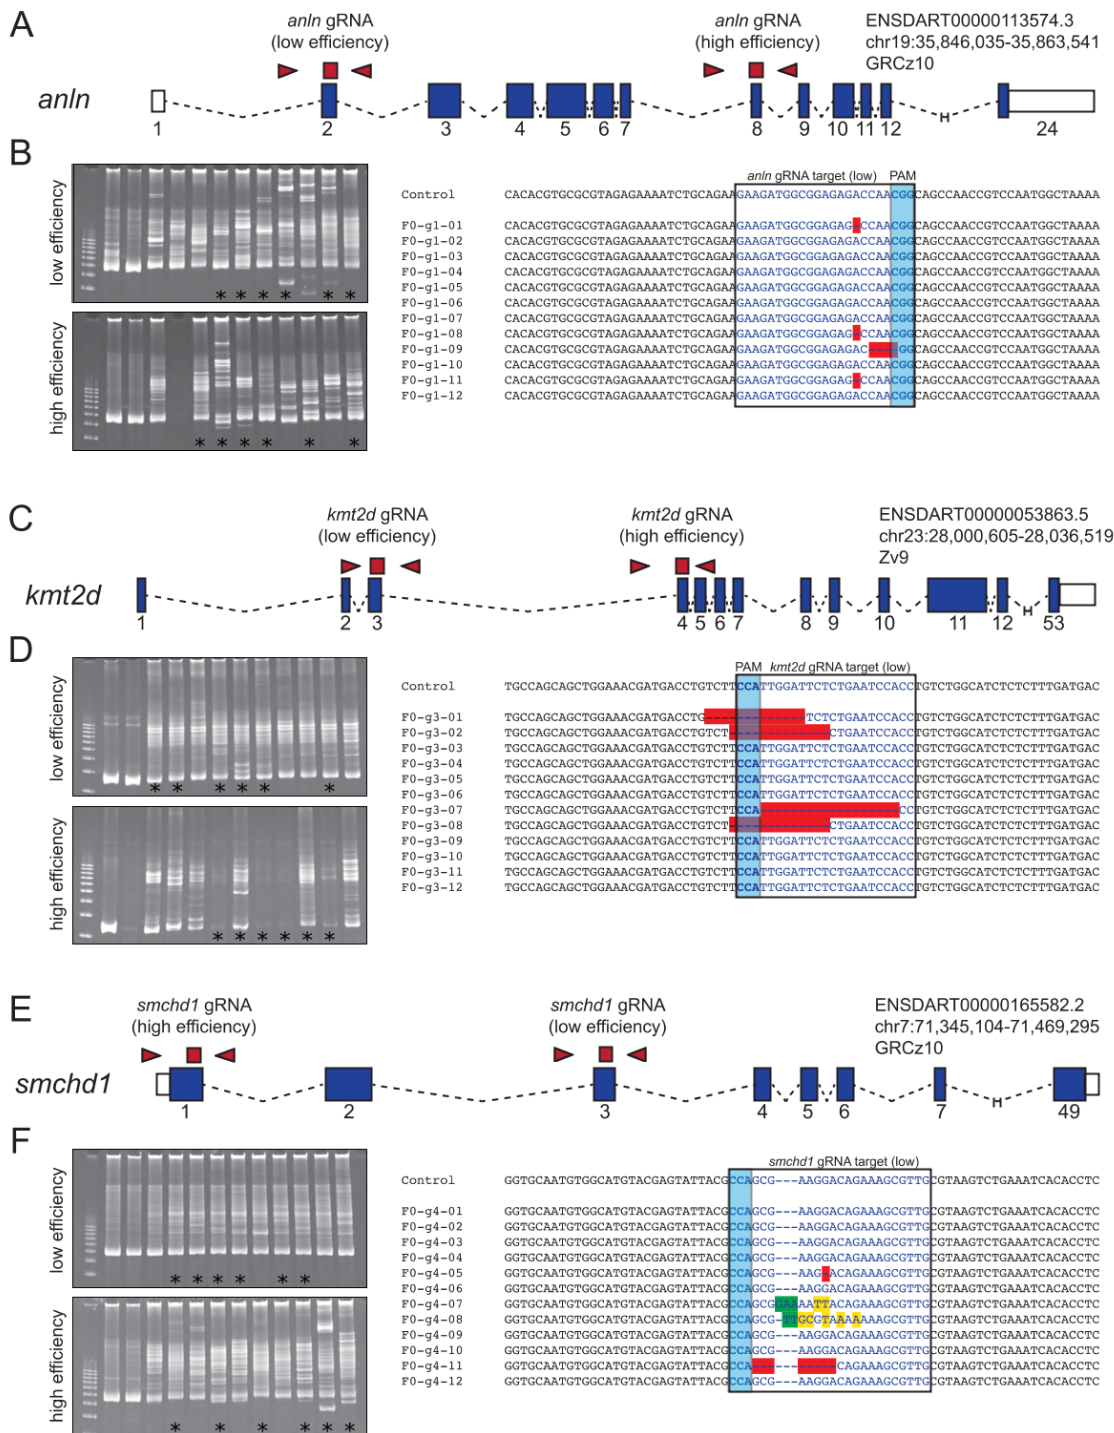

**Confirmation of CRISPR editing efficiencies.** Efficiency data for the high efficiency guides have been published previously. (A, C, E) Schematic of the *D. rerio* locus, sgRNA targeted regions (red squares) and primers used to determine sgRNA efficiency (red triangles) for each gene of interest. (B, D, F) Heteroduplex analysis (left) and Sanger sequencing of 12 clones amplified from a single representative embryo injected with the low efficiency sgRNA plus Cas9 for each target gene (right). Efficiency was estimated by taking the average number of targeted clones across five embryos per sgRNA. \* denotes samples from the heteroduplex analysis chosen for sequencing; PAM, protospacer adjacent motif.

Figure S2

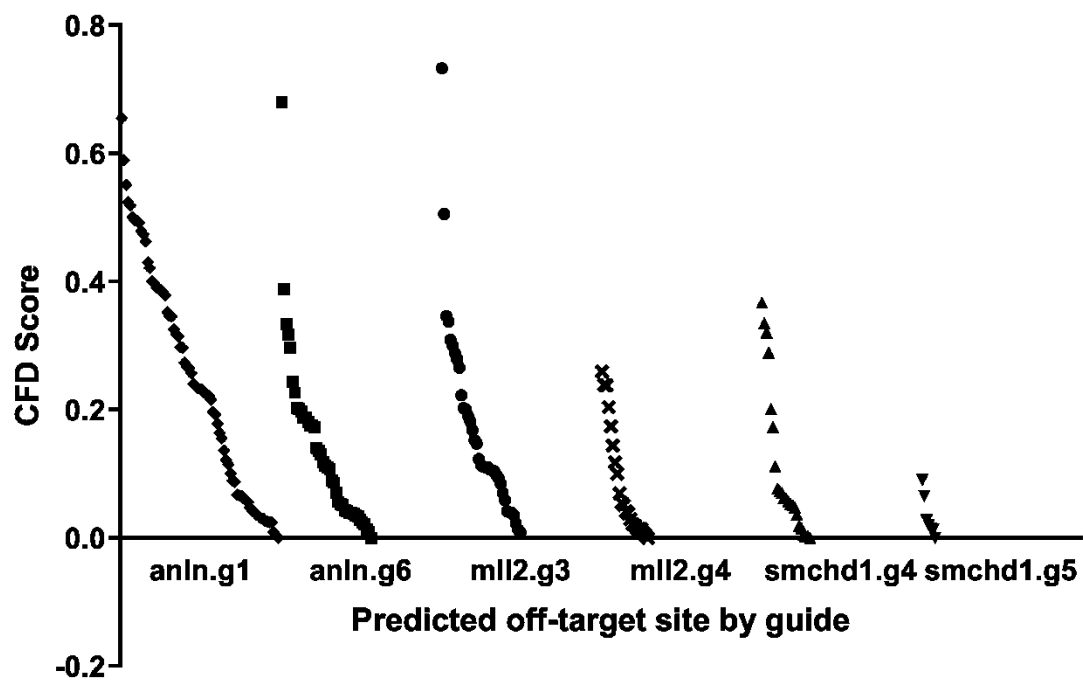

CFD score distribution of MIT-predicted off-target sequences by sgRNA.



## Figure S3

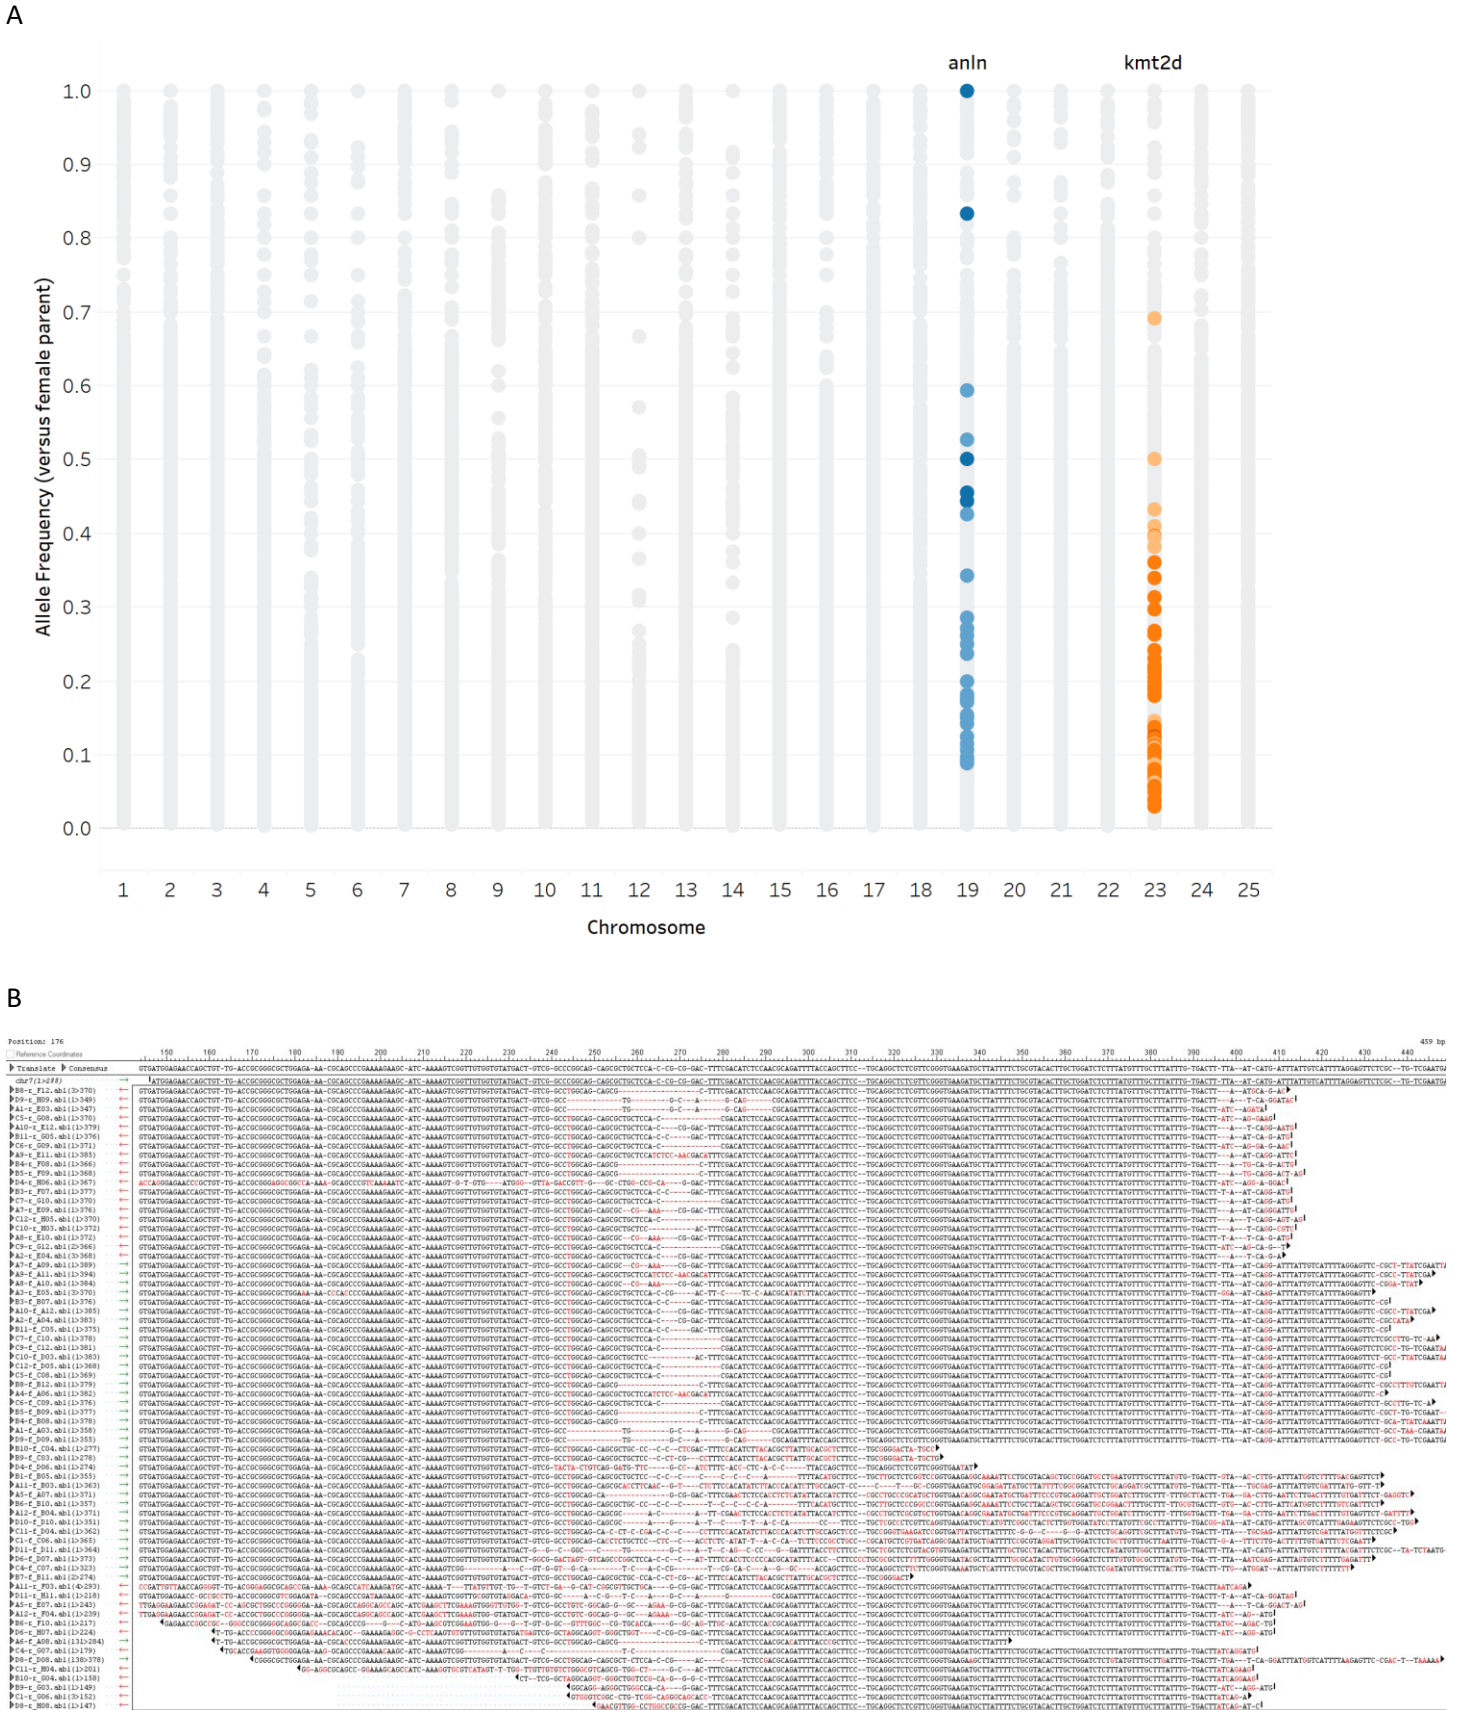

**On-target germline CRISPR-Cas9 edited transmitted to F1.** (A) Grey circles represent all variants calls. On-target allelic series at the *anln* locus (blue) and *kmt2d* locus (orange). (B) Sequencing at the on-target *smchd1* locus in F1s originating from F0s injected with high-efficiency sgRNA plus Cas9.

## Figure S4

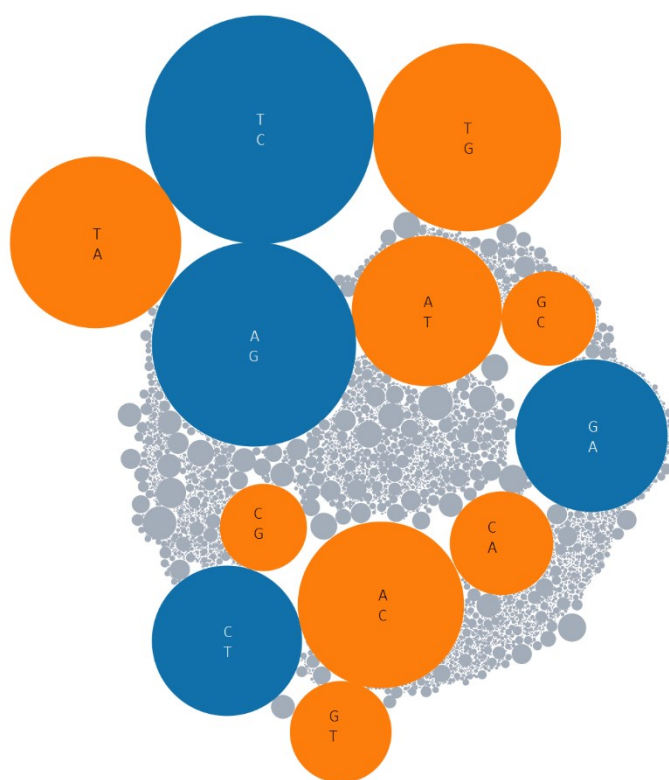

### Transversions

|             |        |
|-------------|--------|
| Transitions | 55,178 |
| 60,191      | 29,319 |

**Transition-Transversion ratio in F1 exomes compared to grandparental exomes.** Sizes of circles represent the number of observations for each variant class: transitions (blue), transversions (orange), indels (grey). After filtering, the transition-transversion ratio is 1.09.

**Table S1: sgRNA gene targets, efficiencies, and quality scores**

| Gene          | sgRNA number | Efficiency (%) | Targeted genomic sequence | Genomic location        | MIT quality score |
|---------------|--------------|----------------|---------------------------|-------------------------|-------------------|
| <i>anln</i>   | g1           | Low (32)       | GAAGATGGCGGAGAGACCAACGG   | chr19:36997110-36997132 | 89                |
|               | g6           | High (100)     | GAAGGCTTATTATCATGCAGTGG   | chr19:36992519-36992541 | 84                |
| <i>kmt2d</i>  | g3           | Low (30)       | GGTGGATTCAGAGAATCCAATGG   | chr23:28003803-28003825 | 79                |
|               | g4           | High (100)     | GGGTGAGGTGCTGATAAACGTGG   | chr23:28007878-28007900 | 91                |
| <i>smchd1</i> | g4           | Low (31)       | CAACGCTTTCTGTCCTTCGCTGG   | chr7:75276576-75276598  | 97                |
|               | g5           | High (100)     | GAGATGTGCGAAAGTCCGCGGTGG  | chr7:75274461-75274483  | 99                |

**Table S2: Variant counts during filtering in F1 individuals**

| Sample             | MuTect2              |                              |                                 | VarScan2            |                              |                                 |
|--------------------|----------------------|------------------------------|---------------------------------|---------------------|------------------------------|---------------------------------|
|                    | originally reported* | exclude grand-parent & dbSNP | passing filters + AF $\geq$ 0.3 | originally reported | exclude grand-parent & dbSNP | passing filters + AF $\geq$ 0.3 |
| smchd1-S1          | 107784               | 16467                        | 93                              | 721082              | 4836                         | 23                              |
| smchd1-S2          | 91320.5              | 14343                        | 65                              | 720522              | 5444                         | 14                              |
| smchd1-S3          | 93910                | 14820                        | 75                              | 722006              | 5175                         | 23                              |
| smchd1-S4          | 98067                | 16162                        | 77                              | 721454              | 4983                         | 19                              |
| smchd1-Cas9-S5     | 99133.5              | 15695                        | 70                              | 722267              | 5152                         | 28                              |
| smchd1-Cas9-S6     | 98879                | 18379                        | 47                              | 722224              | 5048                         | 13                              |
| smchd1-Cas9-S7     | 90394.5              | 16366                        | 79                              | 722826              | 5074                         | 15                              |
| smchd1-Cas9-S8     | 102871.5             | 15899                        | 48                              | 722018              | 4847                         | 8                               |
| smchd1-g5-S9       | 111667.5             | 22892                        | 82                              | 721814              | 5790                         | 25                              |
| smchd1-g5-S10      | 93602.5              | 13941                        | 51                              | 718963              | 5279                         | 19                              |
| smchd1-g5-S11      | 102256.5             | 12190                        | 86                              | 718274              | 4909                         | 23                              |
| smchd1-g5-S12      | 100041               | 14611                        | 73                              | 718720              | 5157                         | 25                              |
| smchd1-g5-Cas9-S13 | 96334.5              | 18489                        | 52                              | 721700              | 5327                         | 21                              |
| smchd1-g5-Cas9-S14 | 91999                | 18250                        | 63                              | 720369              | 5059                         | 27                              |
| smchd1-g5-Cas9-S15 | 98719                | 18893                        | 46                              | 720855              | 5252                         | 13                              |
| smchd1-g5-Cas9-S16 | 97144.5              | 17803                        | 70                              | 720601              | 5114                         | 34                              |

\*Reported count is an average of the counts called against the female grandparent and the counts called against the male grandparent.

**Table S3: Average count of candidate *de novo* mutations by generation and calling method**

| sgRNA          | Efficiency | Cas9    | Condition | MuTect2   |           | VarScan2 |           |
|----------------|------------|---------|-----------|-----------|-----------|----------|-----------|
|                |            |         |           | F0        | F1        | F0       | F1        |
| <b>none</b>    |            | absent  | control   | 41        | 76        | 6        | 19        |
|                |            | present | control   | 24        | 60        | 6        | 16        |
| <b>smchd1</b>  | high       | absent  | control   | 21        | 72        | 4        | 23        |
|                |            | present | edited    | 26        | 55        | 4        | 23        |
|                | low        | absent  | control   | 27        |           | 3        |           |
|                |            | present | edited    | 22        |           | 5        |           |
| <b>anln</b>    | high       | absent  | control   | 19        |           | 3        |           |
|                |            | present | edited    | 29        |           | 5        |           |
|                | low        | absent  | control   | 13        |           | 2        |           |
|                |            | present | edited    | 33        |           | 7        |           |
| <b>kmt2d</b>   | high       | absent  | control   | 23        |           | 3        |           |
|                |            | present | edited    | 27        |           | 3        |           |
|                | low        | absent  | control   | 22        |           | 4        |           |
|                |            | present | edited    | 39        |           | 7        |           |
| <b>Average</b> |            |         |           | <b>26</b> | <b>66</b> | <b>4</b> | <b>20</b> |

**Table S4: Wilcoxon comparison p-values in F1**

| <b>Sample</b>                  | <b>MuTect2</b> | <b>Varscan2</b> |
|--------------------------------|----------------|-----------------|
| <b>Control vs edited</b>       | <b>0.11</b>    | <b>0.47</b>     |
| <b>Cas9 present vs absent</b>  | <b>0.03</b>    | <b>0.71</b>     |
| <b>Guide present vs absent</b> | <b>0.64</b>    | <b>0.15</b>     |

**Table S5: Wilcoxon comparison p-values on variants called by both callers in F1**

| <b>Sample</b>                  | <b>AF <math>\geq</math> 0.3</b> |
|--------------------------------|---------------------------------|
| <b>Control vs edited</b>       | <b>0.78</b>                     |
| <b>Cas9 present vs absent</b>  | <b>0.57</b>                     |
| <b>Guide present vs absent</b> |                                 |
| <b>High vs none</b>            | <b>1.0</b>                      |

**Table S6: Variant counts during filtering in F0 individuals**

| Sample          | MuTect2              |                        |                            | ≥30x VarScan2       |                        |                            |
|-----------------|----------------------|------------------------|----------------------------|---------------------|------------------------|----------------------------|
|                 | originally reported* | exclude parent & dbSNP | passing filters + AF ≥ 0.3 | originally reported | exclude parent & dbSNP | passing filters + AF ≥ 0.3 |
| uninjected-3    | 98730                | 18231                  | 19                         | 714178              | 4281                   | 3                          |
| uninjected-5    | 153632.5             | 38063                  | 63                         | 724678              | 6727                   | 9                          |
| Cas9-4          | 133284               | 25688                  | 25                         | 719479              | 4405                   | 8                          |
| Cas9-5          | 133735               | 25761                  | 24                         | 713112              | 4663                   | 5                          |
| anIn-g1-1       | 117437.5             | 16151                  | 12                         | 706727              | 4899                   | 1                          |
| anIn-g1-3       | 140097               | 28430                  | 15                         | 720890              | 5970                   | 4                          |
| anIn-g1-Cas9-10 | 125951.5             | 19246                  | 26                         | 706488              | 4593                   | 1                          |
| anIn-g1-Cas9-4  | 109913               | 21248                  | 23                         | 712796              | 4419                   | 4                          |
| anIn-g1-Cas9-5  | 125363.5             | 27518                  | 23                         | 717865              | 5235                   | 7                          |
| anIn-g1-Cas9-6  | 152948.5             | 43391                  | 84                         | 726997              | 7228                   | 16                         |
| anIn-g1-Cas9-7  | 123259.5             | 19800                  | 25                         | 711674              | 4780                   | 10                         |
| anIn-g1-Cas9-9  | 113957.5             | 16139                  | 19                         | 704081              | 4497                   | 6                          |
| anIn-g6-3       | 122569.5             | 26063                  | 17                         | 712519              | 4386                   | 1                          |
| anIn-g6-4       | 131988.5             | 22096                  | 21                         | 710221              | 4236                   | 6                          |
| anIn-g6-Cas9-10 | 139893.5             | 30275                  | 21                         | 718040              | 5273                   | 6                          |
| anIn-g6-Cas9-3  | 116501               | 26021                  | 36                         | 713070              | 4956                   | 6                          |
| anIn-g6-Cas9-4  | 123799.5             | 26379                  | 48                         | 717711              | 5671                   | 4                          |
| anIn-g6-Cas9-5  | 132917.5             | 25629                  | 28                         | 715359              | 5025                   | 4                          |
| anIn-g6-Cas9-6  | 137644               | 29799                  | 19                         | 715692              | 4722                   | 4                          |
| anIn-g6-Cas9-8  | 120272.5             | 24997                  | 25                         | 719710              | 4659                   | 6                          |
| kmt2d-g3-4      | 116601.5             | 20554                  | 22                         | 722869              | 5663                   | 5                          |
| kmt2d-g3-5      | 139178               | 28685                  | 23                         | 714383              | 5739                   | 3                          |
| kmt2d-g3-Cas9-1 | 118623               | 24801                  | 60                         | 720884              | 4646                   | 10                         |
| kmt2d-g3-Cas9-2 | 116798               | 20458                  | 46                         | 715781              | 5446                   | 7                          |
| kmt2d-g3-Cas9-4 | 133515.5             | 34500                  | 45                         | 722333              | 5807                   | 10                         |
| kmt2d-g3-Cas9-5 | 111948.5             | 25153                  | 32                         | 715519              | 4491                   | 5                          |
| kmt2d-g3-Cas9-6 | 119867.5             | 24248                  | 28                         | 719554              | 5316                   | 4                          |
| kmt2d-g3-Cas9-9 | 133272               | 30346                  | 23                         | 720748              | 5624                   | 6                          |
| kmt2d-g4-1      | 123010.5             | 31250                  | 26                         | 716594              | 5504                   | 5                          |
| kmt2d-g4-5      | 124993.5             | 26831                  | 21                         | 713325              | 5172                   | 2                          |
| kmt2d-g4-Cas9-4 | 119952.5             | 24033                  | 28                         | 707322              | 4837                   | 2                          |
| kmt2d-g4-Cas9-5 | 119101.5             | 22956                  | 20                         | 705218              | 4510                   | 4                          |
| kmt2d-g4-Cas9-6 | 122240               | 26406                  | 31                         | 711825              | 5501                   | 2                          |



|                   |          |       |    |        |      |    |
|-------------------|----------|-------|----|--------|------|----|
| kmt2d-g4-Cas9-7   | 119373   | 33534 | 31 | 717861 | 5671 | 3  |
| kmt2d-g4-Cas9-8   | 137530   | 33943 | 23 | 722359 | 5524 | 5  |
| kmt2d-g4-Cas9-9   | 134129   | 37854 | 32 | 721268 | 5812 | 7  |
| smchd1-g4-1       | 128430.5 | 26487 | 32 | 721553 | 5109 | 6  |
| smchd1-g4-2       | 122734.5 | 32737 | 22 | 714473 | 5452 | 1  |
| smchd1-g4-Cas9-2  | 112519.5 | 21120 | 18 | 712893 | 4548 | 1  |
| smchd1-g4-Cas9-3  | 133350.5 | 28182 | 31 | 715977 | 4646 | 6  |
| smchd1-g4-Cas9-4  | 129172.5 | 26522 | 17 | 709164 | 4852 | 7  |
| smchd1-g4-Cas9-5  | 120364   | 26252 | 24 | 716579 | 4391 | 5  |
| smchd1-g4-Cas9-7  | 125670.5 | 24490 | 28 | 718073 | 4766 | 5  |
| smchd1-g4-Cas9-8  | 124193.5 | 26396 | 17 | 713050 | 4667 | 7  |
| smchd1-g5-2       | 139507   | 34868 | 16 | 719051 | 5491 | 4  |
| smchd1-g5-3       | 133208.5 | 32225 | 27 | 721170 | 5669 | 4  |
| smchd1-g5-Cas9-10 | 125004   | 27506 | 13 | 707974 | 4411 | 3  |
| smchd1-g5-Cas9-2  | 128403   | 29684 | 33 | 716875 | 4833 | 5  |
| smchd1-g5-Cas9-4  | 127675.5 | 27174 | 24 | 717089 | 5516 | 4  |
| smchd1-g5-Cas9-6  | 126063   | 31473 | 42 | 721368 | 5204 | 11 |
| smchd1-g5-Cas9-8  | 95182.5  | 15438 | 14 | 668596 | 3244 | 2  |
| smchd1-g5-Cas9-9  | 107702   | 24169 | 33 | 721002 | 6121 | 2  |

\*Reported count is an average of the counts called against the female parent and the counts called against the male parent.

**Table S7: Wilcoxon comparison p-values on predicted variants in F0**

| Sample                  | MuTect2       |               |           | VarScan2      |               |           |
|-------------------------|---------------|---------------|-----------|---------------|---------------|-----------|
|                         | AF $\geq$ 0.3 | AF $\geq$ 0.1 | All calls | AF $\geq$ 0.3 | AF $\geq$ 0.1 | All calls |
| Control vs edited       | 0.04          | 0.08          | 0.89      | 0.15          | 0.48          | 0.82      |
| Cas9 present vs absent  | 0.04          | 0.15          | 0.74      | 0.05          | 0.34          | 0.89      |
| Guide present vs absent |               |               |           |               |               |           |
| High vs none            | 0.90          | 0.31          | 0.58      | 0.16          | 0.26          | 0.41      |
| Low vs none             | 0.69          | 0.86          | 0.87      | 0.69          | 0.49          | 0.58      |

**Table S8: Wilcoxon comparison p-values on reviewed variants in F0 (VarScan2 only)**

| <b>Sample</b>                  | <b>AF <math>\geq</math> 0.3</b> |
|--------------------------------|---------------------------------|
| <b>Control vs edited</b>       | <b>0.38</b>                     |
| <b>Cas9 present vs absent</b>  | <b>0.32</b>                     |
| <b>Guide present vs absent</b> |                                 |
| <b>High vs none</b>            | <b>0.50</b>                     |
| <b>Low vs none</b>             | <b>0.61</b>                     |

**Table S9: Wilcoxon comparison p-values on variants called by both callers in F0**

| <b>Sample</b>                  | <b>AF <math>\geq</math> 0.3</b> | <b>AF <math>\geq</math> 0.1</b> | <b>No filter</b> |
|--------------------------------|---------------------------------|---------------------------------|------------------|
| <b>Control vs edited</b>       | <b>0.78</b>                     | <b>0.49</b>                     | <b>0.97</b>      |
| <b>Cas9 present vs absent</b>  | <b>0.96</b>                     | <b>0.77</b>                     | <b>0.51</b>      |
| <b>Guide present vs absent</b> |                                 |                                 |                  |
| <b>High vs none</b>            | <b>1.0</b>                      | <b>1.0</b>                      | <b>0.25</b>      |
| <b>Low vs none</b>             | <b>0.89</b>                     | <b>0.86</b>                     | <b>0.44</b>      |

**Table S10: Expected off-target observations in region by chance, hypergeometric p-value**

| <b>Guide</b>     | <b>Sample size<br/>(# off-target sites<br/>x 200bp)</b> | <b>Max.<br/>observed<br/>variants in<br/>individual</b> | <b>p-value (under-<br/>represented) vs<br/>population max.<br/>variant rate</b> | <b>p-value (under-<br/>represented) vs<br/>population min.<br/>variant rate</b> |
|------------------|---------------------------------------------------------|---------------------------------------------------------|---------------------------------------------------------------------------------|---------------------------------------------------------------------------------|
| <b>anln-g1</b>   | 317200                                                  | 2                                                       | 1.07e-17                                                                        | .531                                                                            |
| <b>anln-g6</b>   | 524400                                                  | 1                                                       | 5.63e-32                                                                        | .077                                                                            |
| <b>kmt2d-g3</b>  | 269200                                                  | 1                                                       | 4.2e-16                                                                         | .363                                                                            |
| <b>kmt2d-g4</b>  | 169200                                                  | 1                                                       | 5.5e-10                                                                         | .606                                                                            |
| <b>smchd1-g4</b> | 183400                                                  | 0                                                       | NA                                                                              | NA                                                                              |
| <b>smchd1-g5</b> | 151400                                                  | 1                                                       | .367                                                                            | .657                                                                            |

Hypergeometric p-values calculated with the Rothstein lab hypergeometric calculator, using the capture space (74691693 bp) as the population size, and a high or low estimate for the expected population variant counts (10975 vs 608, respectively).

**Table S11: Variants at predicted off-target loci**

| Sample           | Condition  | Variant         | Ref             | Alt  | Variant Caller | Predicted off-target | Prediction algorithm            | Allele Frequency |
|------------------|------------|-----------------|-----------------|------|----------------|----------------------|---------------------------------|------------------|
| anln-g1-3        | Guide only | 24:28102298*    | A               | C    | VarScan2       | 24:28102339-61       | Cas-OFFinder                    | 0.05             |
| anln-g1-Cas9-7   | Edited     | 24:28102298*    | A               | C    | VarScan2       | 24:28102339-61       | Cas-OFFinder                    | 0.05             |
| anln-g1-3        | Guide only | 2:44898792**    | C               | T    | VarScan2       | 2:44898891-913       | MIT CRISPOR                     | 0.06             |
| anln-g1-Cas9-9   | Edited     | 2:44898798**    | G               | T    | VarScan2       | 2:44898891-913       | MIT CRISPOR                     | 0.06             |
| anln-g1-Cas9-6   | Edited     | 7:65593684**    | AC              | A    | VarScan2       | 7:65593592-602       | CRISPR-direct                   | 0.1              |
| anln-g6-Cas9-10  | Edited     | 16:54853302-9** | Clustered event |      | MuTect2        | 16:54853401-11       | CRISPR-direct                   | <0.05            |
| kmt2d-g4-Cas9-7  | Edited     | 5:62586647**    | A               | ACAC | VarScan2       | 5:62586546-56        | CRISPR-direct                   | 0.26             |
| anln-g6-Cas9-3   | Edited     | 16:10603230†    | C               | A    | VarScan2       | 16:10603172-82       | CRISPR-direct                   | 0.06             |
| kmt2d-g3-Cas9-1  | Edited     | 22:20459578†    | C               | T    | VarScan2       | 22:20459646-56       | CRISPR-direct                   | 0.08             |
| kmt2d-g3-Cas9-2  | Edited     | 22:20459578†    | C               | T    | VarScan2       | 22:20459646-56       | CRISPR-direct                   | 0.08             |
| kmt2d-g3-Cas9-4  | Edited     | 22:20459578†    | C               | T    | VarScan2       | 22:20459646-56       | CRISPR-direct                   | 0.1              |
| smchd1-g5-3      | Guide only | 2:50824997-9    | CTG             | AAA  | MuTect2        | 2:50824943-53        | CRISPR-direct                   | 0.05             |
| kmt2d-g4-Cas9-5  | Edited     | 14:2529163      | A               | G    | VarScan2       | 14:2529206-28        | Cas-OFFinder                    | 0.05             |
| smchd1-g5-Cas9-2 | Edited     | 25:21049069-77  | ACTAGCGTG       | A    | MuTect2        | 25:21048965-75       | CRISPR-direct                   | <0.05            |
| anln-g1-Cas9-6   | Edited     | 14:11156689     | GAGACC          | A    | MuTect2        | 14:11156666-99       | MIT<br>CRISPOR,<br>Cas-OFFinder | <0.05            |

\*Variant at off-target site reported in both control and edited samples for this guide

\*\*Variant observed in siblings from other conditions

† Variant at off-target site not supported by reads on both strands
